# Supplementary material for: Pharmacological tumor PDL1 depletion with chlorambucil treats ovarian cancer and melanoma: improves antitumor immunity and renders anti-PDL1-resistant tumors anti-PDL1-sensitive through NK cell effects
Source: PubMed Central journal article supplement — J Immunother Cancer. 2023 Feb 9;11(2):e004871. doi: 10.1136/jitc-2022-004871 (PMC9923271; doi:10.1136/jitc-2022-004871), 2023-02-09
Supplement: jitc-2022-004871supp001.pdf [file jitc-2022-004871supp001.pdf]

## Supplementary figures

## Supplemental Figure 1

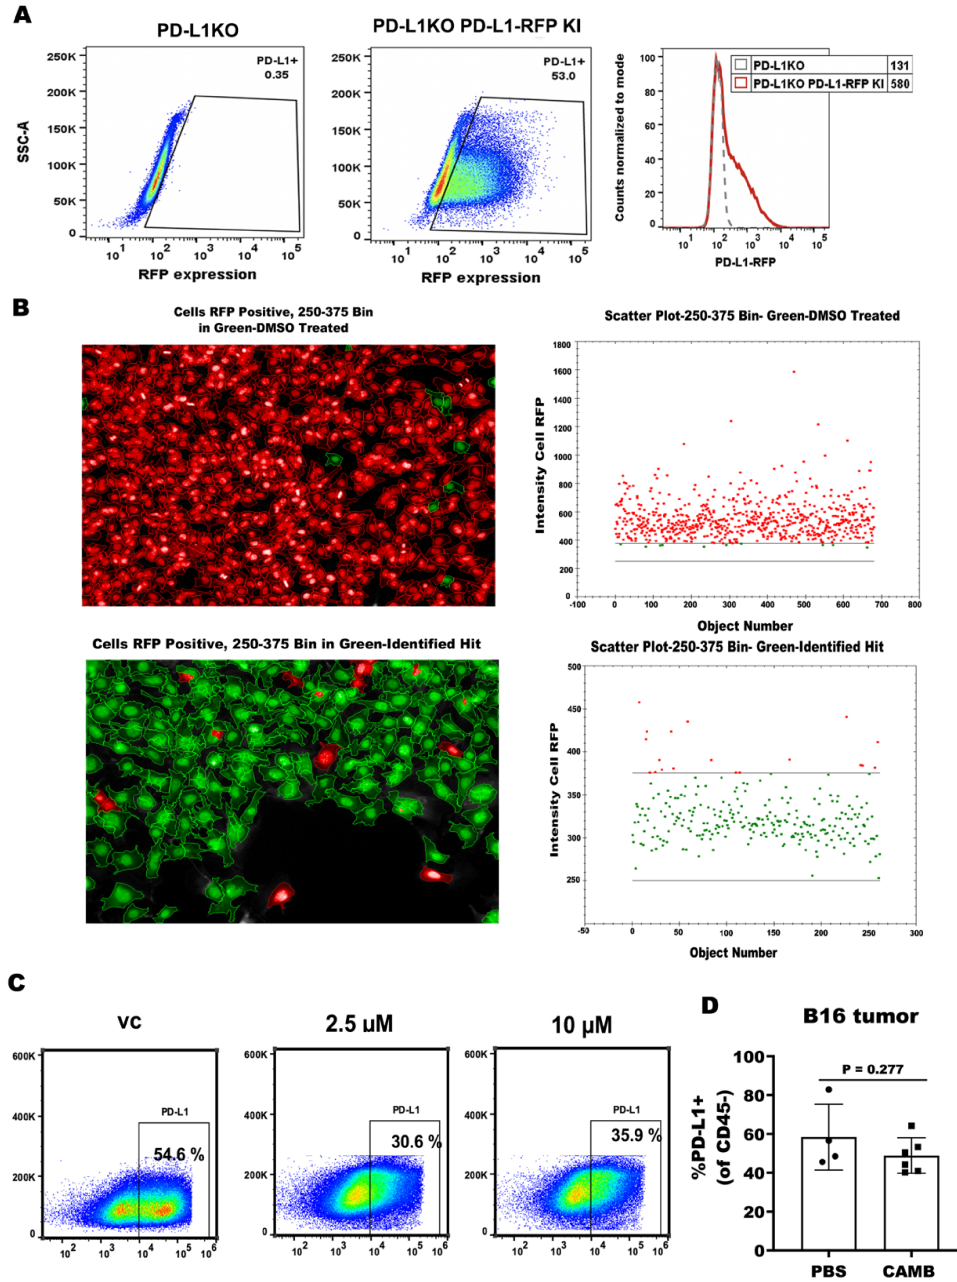

Figure S1. High throughput screening identified PDL1 depletion drugs.

**(A)** Flow cytometry for PDL1 expression in PDL1<sup>KO</sup> B16 with or without PDL1-RFP knock-in (RFP<sup>KI</sup>). **(B)** PDL1<sup>KO</sup> B16 with RFP-PDL1<sup>KI</sup> cells incubated with compounds from the Prestwick and LOPAC libraries (1200 and 1280 compounds, respectively) at 2.5 and 10  $\mu$ M using the Agilent Bravo liquid pipetting platform and then imaged by Operetta High Content system after 48 hours incubation. **(C)** Flow cytometry for PDL1 expression in OVCAR5 with or without PMEG treatment. VC, vehicle control. **(D)** WT mice challenged with B16 cells, treated with 3 mg/kg CAMB as described in methods and sacrificed on day 19 after tumor challenged, 1 day after final CAMB. Tumors were collected for flow cytometry analysis. Summary graph of PDL1 percentage in the CD45<sup>+</sup> gates. P-value by unpaired *t*-test.

**Supplemental Figure 2**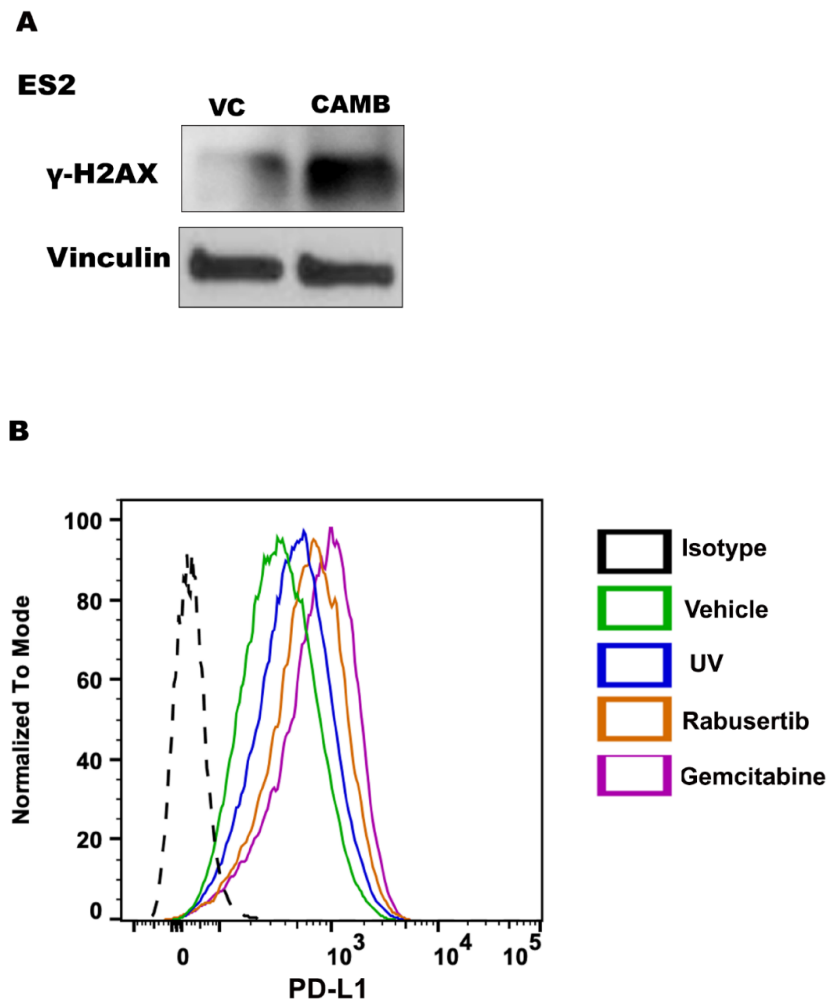

**Figure S2. Chlorambucil induces DNA damage.**

(A) Western blots for  $\gamma$ -H2AX expression in ES2 cells incubated *in vitro* with (+) or without (-) chlorambucil (10  $\mu$ M) for 48 hours. (B) Flow cytometry comparing PDL1 expression in OVCAR5 cells with or without ultraviolet (UV) irradiation (2 Gy, assessed 24 hours later), gemcitabine (10  $\mu$ M, 24 hours incubation), rabusertib (1  $\mu$ M, 48 hours incubation).

**Supplemental Figure 3**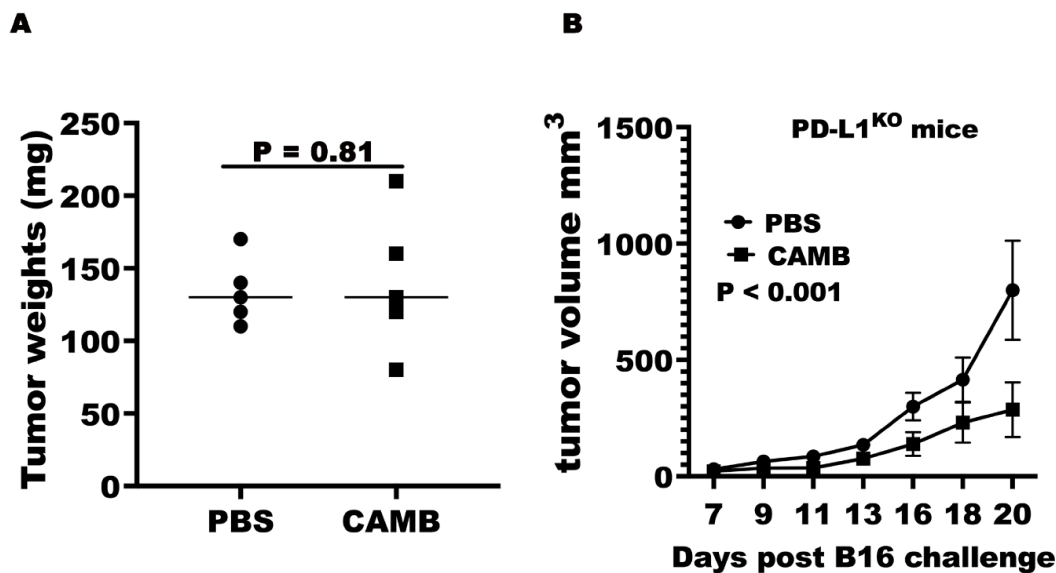

**Figure S3. Chlorambucil efficacy is independent of host PDL1 expression.**

(A) WT mice challenged with PDL1<sup>lo</sup> ID8agg cells and treated as described in Fig. 3A. Mice body weight measured weekly, and increased is relative to baseline. N = 5 for PBS and 6 for chlorambucil (CAMB). At the end of experiment, mice were sacrificed, and tumor weights measured. Each symbol is an individual tumor, P-value, unpaired *t*-test. (B) Tumor volume of PDL1<sup>KO</sup> mice challenged with B16 cells and treated as described in Fig. 3E. N = 4 for both PBS and CAMB. P-value, two-way ANOVA.

## Supplemental Figure 4

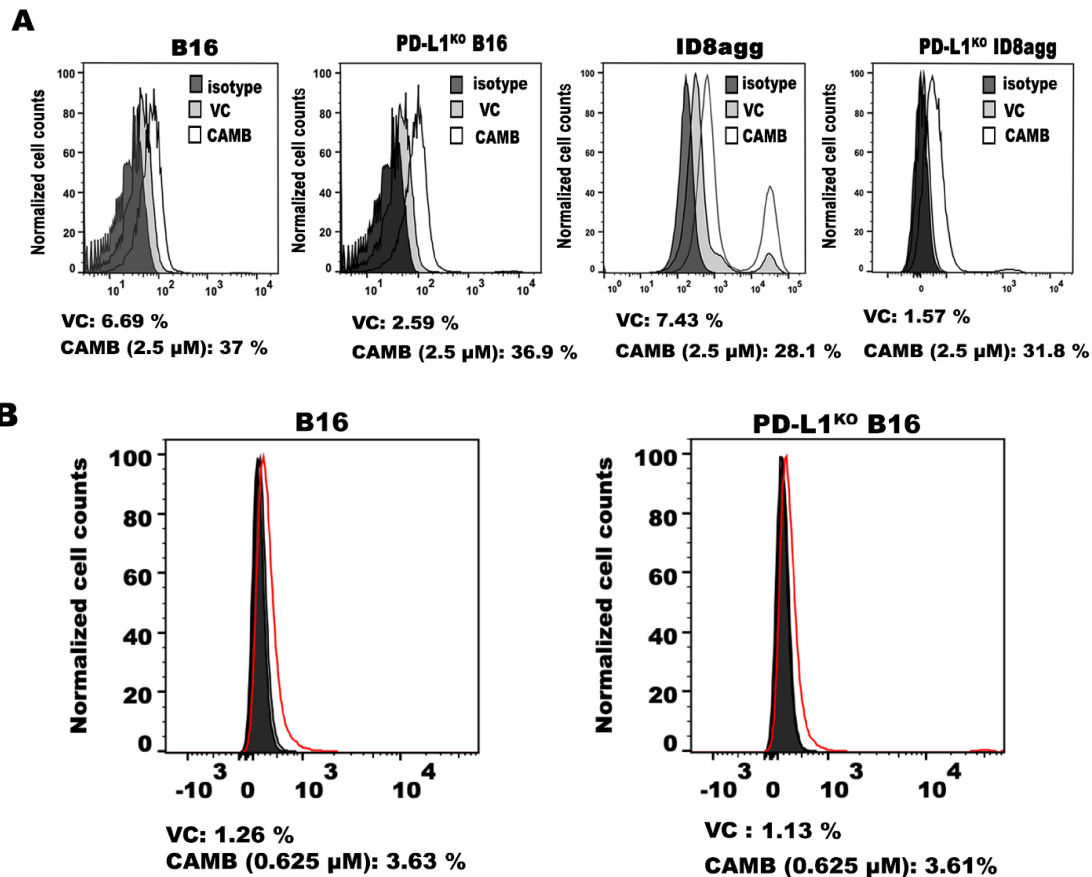

**Figure S4. Chlorambucil promotes ICD in selected tumor cells**

**(A)** Flow cytometry analysis of calreticulin content in vehicle control (VC) or chlorambucil (CAMB)-treated ID8agg or PDL1<sup>KO</sup> ID8agg (2.5  $\mu$ M), B16 or PDL1<sup>KO</sup> B16 (2.5  $\mu$ M) for 48 hours. Isotype: isotype control for anti-calreticulin antibody. Data represent 1 of 3 independent experiments with similar results. **(B)** Flow cytometry analysis of calreticulin content in vehicle control (VC) or chlorambucil (CAMB)-treated B16 or PDL1<sup>KO</sup> B16 (0.625  $\mu$ M). Isotype: isotype control for anti-calreticulin antibody. Data represent 1 of 3 independent experiments with similar results.

**Supplemental Figure 5**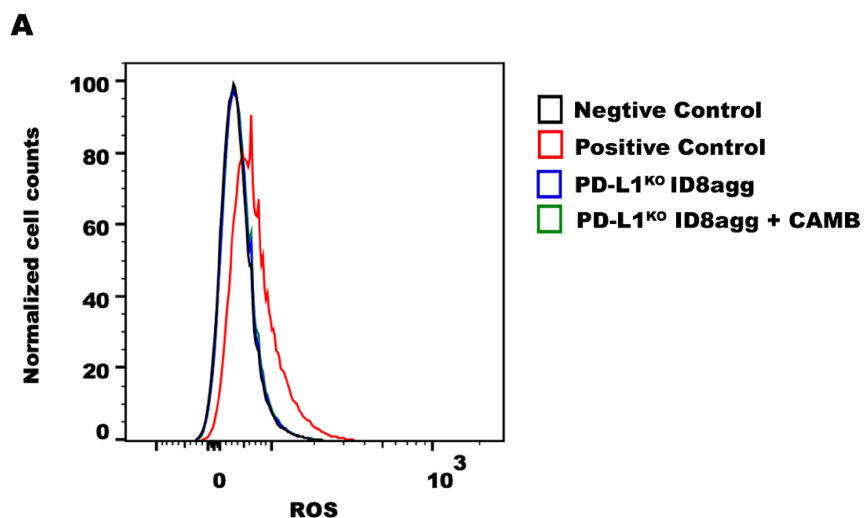

**Positive control: 18.8 %**

**PD-L1<sup>KO</sup> ID8agg: 3.93 %**

**PD-L1<sup>KO</sup> ID8agg + CAMB: 4.21%**

**Figure S5. ROS pathway does not mediate chlorambucil-induced ICD.**

**(A)** Flow cytometry analysis of ROS production in vehicle control (VC) or chlorambucil (CAMB)-treated ID8agg (2.5  $\mu$ M) for 48 hours. Negative control: PDL1<sup>KO</sup> ID8agg cells only labeled with H2DCFDA; Positive control: PDL1<sup>KO</sup> ID8agg cells pretreat with 50  $\mu$ M tert-butyl hydrogen peroxide for 2 hours. Data represent 1 of 3 independent experiments with similar results. Percent positive cells shown at the bottom of the figure.

## Supplemental Figure 6

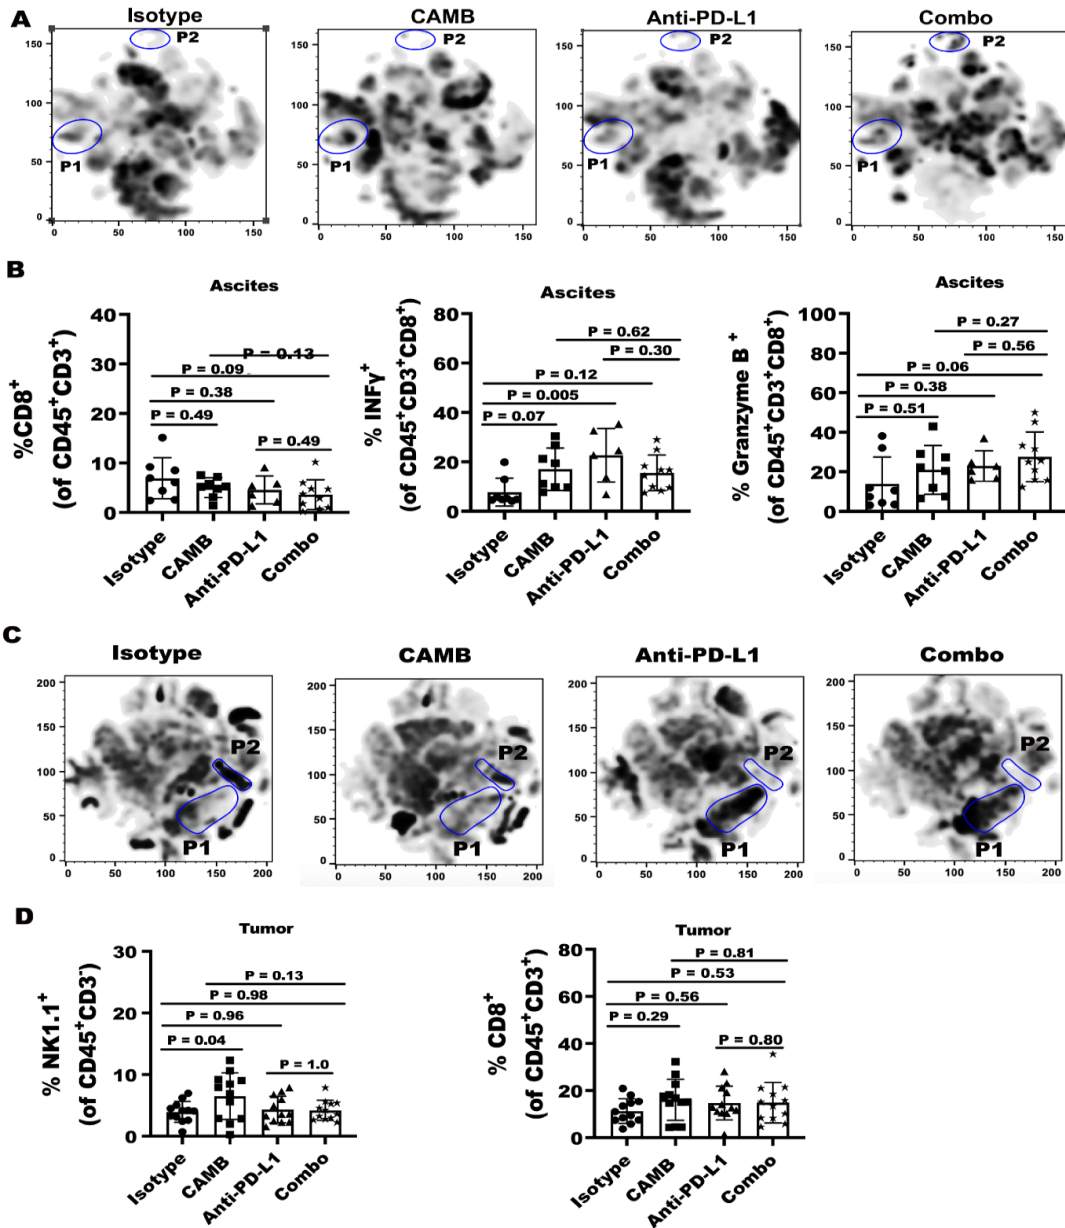

**Figure S6. Chlorambucil and  $\alpha$ PDL1 treatments or their combination alter the tumor immune environment distinctly**

**(A)** *t*-SNE analysis of flow cytometry data in ascites of ID8agg tumor-bearing mice sacrificed 30 days after tumor challenge with indicated treatments. The CD8<sup>+</sup> T cell cluster is P1 and the NK cell cluster is P2. CAMB, chlorambucil. Combination, chlorambucil plus anti-PDL1. Treatment dose and schedule as in Fig. 4C. **(B)** CD8<sup>+</sup>, CD8<sup>+</sup> IFN $\gamma$ <sup>+</sup>CD8<sup>+</sup> or Granzyme B<sup>+</sup> T cell prevalence in ascites from ID8agg tumor challenged mice after treatment as described in Fig. 4C. Isotype with each treatment. P-value, one-way ANOVA. Chlorambucil versus combination and anti-PDL1 versus combination using Mann-Whitney test. **(C)** *t*-SNE analysis of flow cytometry analysis of the immune landscape in PDL1<sup>KO</sup> B16 tumors treated as described in Figure 4A. **(D)** Percent NK1.1<sup>+</sup> cells and CD8<sup>+</sup> T cells in PDL1<sup>KO</sup> B16 tumor treated as described in figure 4A, The CD8<sup>+</sup> T cell cluster is P1 and the NK cell cluster is P2. Isotype with each treatment. P-value, one-way ANOVA. Chlorambucil versus combination and anti-PDL1 versus combination using Mann-Whitney test.



**Supplemental Figure 7****A**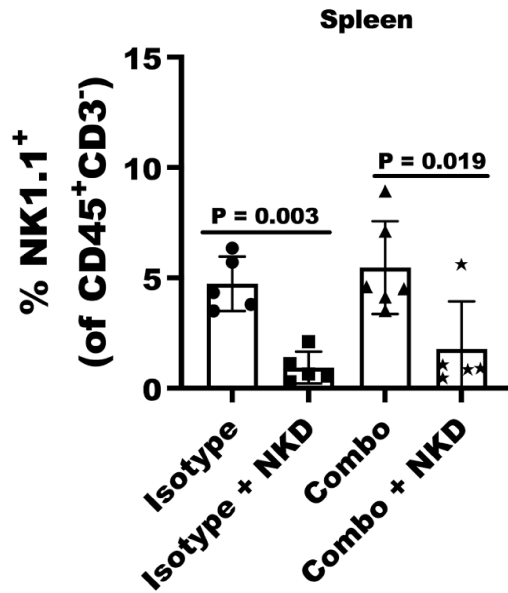**Figure S7. *In vivo* NK cell depletion validation**

(A) NK cell depletion (NKD) efficiency evaluated by measuring spleen NK1.1<sup>+</sup> cells after anti-NK1.1 treatment in Fig. 5F. Mice sacrificed on day 28 post tumor challenge. Combo, Chlorambucil plus  $\alpha$ PDL1.

## Supplemental Figure 8

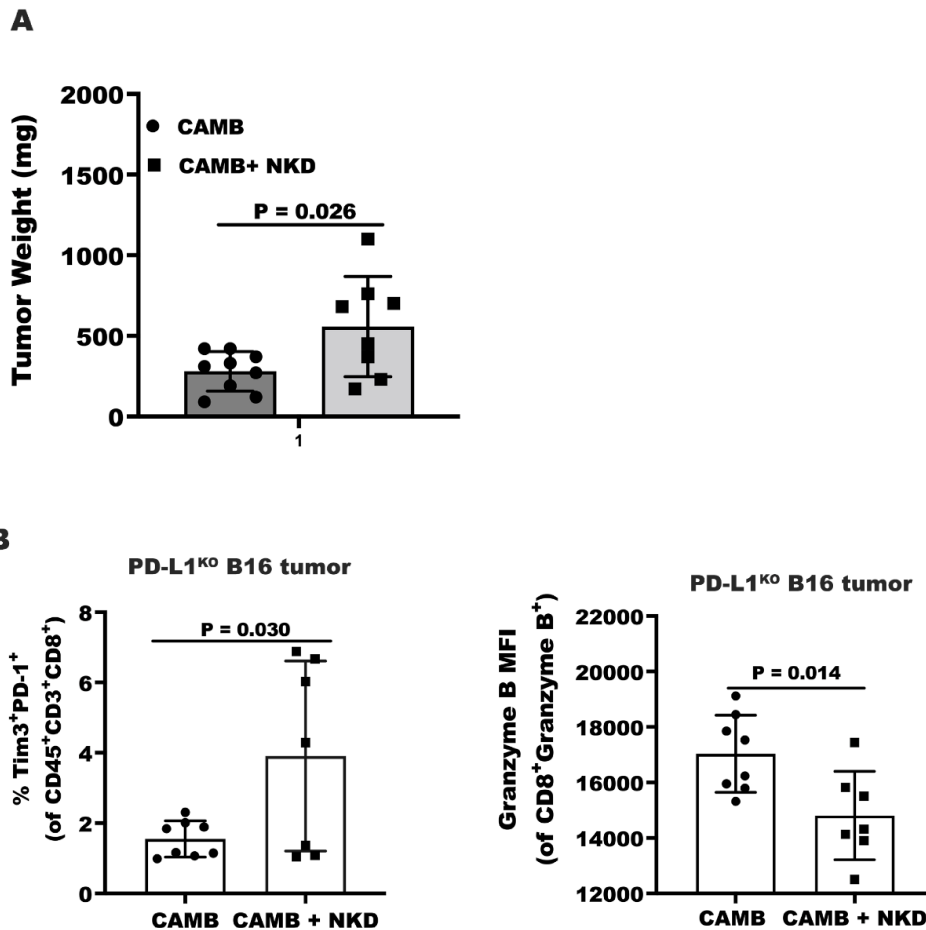

**Figure S8. Chlorambucil inhibits PDL1<sup>KO</sup> B16 tumor growth in an NK cell-dependent manner.**

(A) Tumor weight of WT mice (N = 5/group) challenged with PDL1<sup>KO</sup> B16 and treated with 3 mg/kg chlorambucil (CAMB) ± anti-NK1.1 250 µg/mouse. NKD, NK cell depletion with αNK1.1.

(B) Tim3<sup>+</sup>PD-1<sup>+</sup> (exhausted) CD8<sup>+</sup> T cells and Granzyme B production by CD8 T cells. P-value, *t*-test.

## Supplemental Figure 9

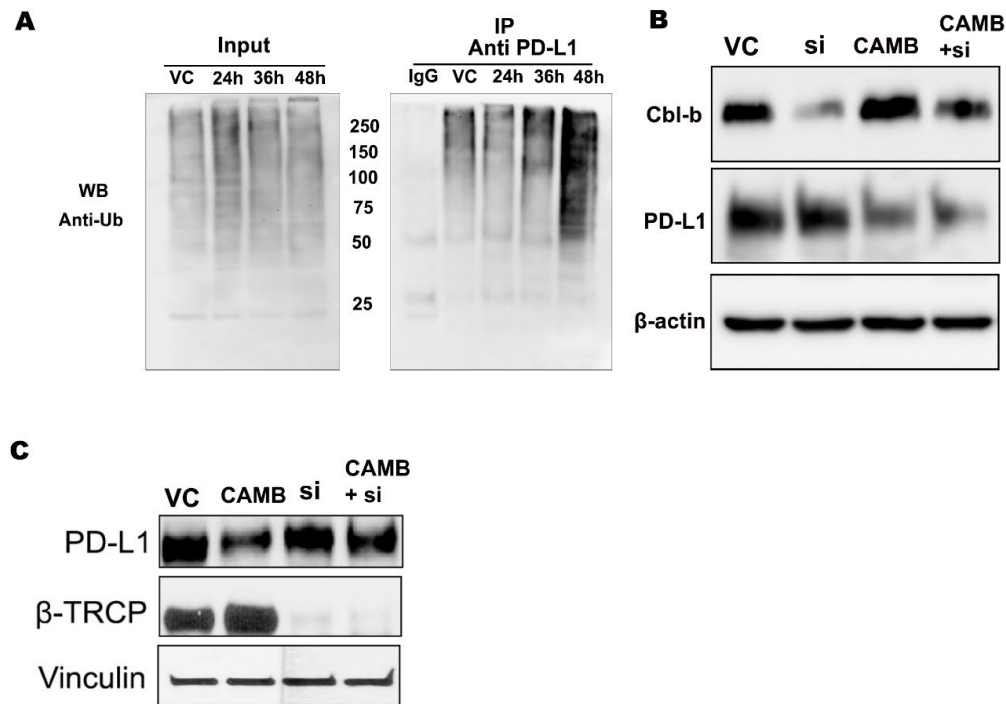

**Figure S9. PDL1 degradation is dependent on the E3 ligase  $\beta$ -TrCP rather than CBL-B.**

**(A)** Ubiquitinated PDL1 in ES2 cells treated with chlorambucil (CAMB, 10  $\mu$ M) for indicated time was immunoprecipitated (IP) using  $\alpha$ PDL1 antibody (1:50) and subjected to immunoblot analysis with anti-ubiquitin (Ub) antibody. Molecular weights to the left of the IP blot. Immunoblot for PDL1 with chlorambucil (2.5  $\mu$ M) or siCBL-B **(B)** or si $\beta$ -TrCP **(C)** with chlorambucil (2.5  $\mu$ M) in ES2 cells, both for 48 hours.
